# Supplementary material for: Thermography in ergonomic assessment: a study of wood processing industry workers
Source: PeerJ. 2022 Sep 20;10:e13973. doi: 10.7717/peerj.13973 (PMC9504449; doi:10.7717/peerj.13973)
Supplement: Supplemental Information 1 — Note: The values of T maximum and T average were obtained directly from the Thermal Imager device (FLUKE, model TI 400), so they were not calculated [file peerj-10-13973-s001.xlsx]

## Sheet: Plan1
Day I
Body Regions of Interest	Lumbar		Scapular			Anthropometric Data
Occupation	T maximum	T average	T maximum	T average		Age	Weight	Height	BMI
General Services	34.3	31.5	33.7	32.3		38	76	1.75	24.8163
Band saw operator	33.4	30.8	32.5	30.8		48	70	1.84	20.6758
Plankman	34.7	33.2	35.3	34		35	60	1.7	20.7612
General Services	32.5	31.4	32.8	31.5		33	60	1.72	21.5139
Plankman	34.4	32.2	34.4	32		33	72	1.67	22.7244
Top remover	35.4	33.5	35.8	34.3		46	60	1.78	20.7612
Circular Saw	34.3	32.8	34.05	32.8		58	63	1.7	21.7993
Circular Saw	34.9	32.5	34.7	33.3		41	62	1.7	21.4533
Top remover	34.4	32.2	34.7	32.9		21		1.7
Averages	34.2556	32.2333	34.2167	32.6556	Average	39.2222	65.375	1.72889	21.8132
Day II					Maximum	58	76	1.84	24.8163
Body Regions of Interest	Lumbar		Scapular		Minimum	21	60	1.67	20.6758
Occupation	T maximum	T average	T maximum	T average
General Services	34.1	31.1	33.1	31.3
Band saw operator	33.4	31.5	33	31
Plankman	35.1	33	35.1	33.7
General Services	32.6	30.8	32.9	31.6
Plankman	34.3	31.3	33.6	31.9
Top remover	34.8	31.6	34.8	33.5
Circular Saw	34.9	32.9	34.2	32.7
Circular Saw	35.4	33.7	34.6	33.1
Top remover	33.8	32	34.1	32.5
Averages	34.2667	31.9889	33.9333	32.3667
T maximum is the maximum temperature.
T average is the average temperature.
BMI is the Body Mass Index
