# Supplementary material for: Thermography in ergonomic assessment: a study of wood processing industry workers
Source: PeerJ journal article supplement (doi:10.7717/peerj.13973), 2022-09-20
Supplement: Teste_estatstico_1.pdf [file Teste_estatstico_1.pdf]

**One Way Analysis of Variance**

Tuesday, May 10, 2022, 15:28:11

**Data source:** Thermography data on laptop

**Normality Test (Shapiro-Wilk)** Passed (P = 0.469)

**Equal Variance Test:** Passed (P = 0.968)

| Group Name    | N | Missing | Mean   | Std Dev | SEM   |
|---------------|---|---------|--------|---------|-------|
| Lumbar - D1   | 9 | 0       | 32.233 | 0.882   | 0.294 |
| Lumbar - D2   | 9 | 0       | 31.989 | 0.991   | 0.330 |
| Scapular - D1 | 9 | 0       | 32.656 | 1.137   | 0.379 |
| Scapular - D2 | 9 | 0       | 32.367 | 0.971   | 0.324 |

| Source of Variation | DF | SS     | MS    | F     | P     |
|---------------------|----|--------|-------|-------|-------|
| Between Groups      | 3  | 2.084  | 0.695 | 0.696 | 0.561 |
| Residual            | 32 | 31.951 | 0.998 |       |       |
| Total               | 35 | 34.036 |       |       |       |

The differences in the mean values among the treatment groups are not great enough to exclude the possibility that the difference is due to random sampling variability; there is not a statistically significant difference (P = 0.561).

Power of performed test with alpha = 0.050: 0.049

The power of the performed test (0.049) is below the desired power of 0.800. Less than desired power indicates you are less likely to detect a difference when one actually exists. Negative results should be interpreted cautiously.
