# Supplementary material for: Thermography in ergonomic assessment: a study of wood processing industry workers
Source: PeerJ journal article supplement (doi:10.7717/peerj.13973), 2022-09-20
Supplement: Teste_normalidade.pdf [file Teste_normalidade.pdf]

**Normality Test (Shapiro-Wilk)**

Tuesday, May 10, 2022, 15:23:39

**Data source:** Thermography data on laptop

|                |                     |           |        |
|----------------|---------------------|-----------|--------|
| Lumbar - D1:   | W-Statistic = 0.972 | P = 0.914 | Passed |
| Lumbar - D2:   | W-Statistic = 0.920 | P = 0.396 | Passed |
| Scapular - D1: | W-Statistic = 0.981 | P = 0.971 | Passed |
| Scapular - D2: | W-Statistic = 0.950 | P = 0.688 | Passed |

A test that fails indicates that the data varies significantly from the pattern expected if the data was drawn from a population with a normal distribution.

A test that passes indicates that the data matches the pattern expected if the data was drawn from a population with a normal distribution.
